# Supplementary material for: Tridentate chelating ligand based fluorescent Zn(ii) coordination compounds for highly selective detection of picric acid
Source: Royal Society of Chemistry journal article supplement (doi:10.1039/d3nj05089k), 2024-01-01
Supplement: d3nj05089k1.pdf [file d3nj05089k1.pdf]

## SUPPORTING INFORMATION

### **Tridentate chelating ligand based fluorescent Zn(II) coordination compounds for highly selective detection of picric acid**

Dama Saren,<sup>a</sup> Ennio Zangrando,<sup>b</sup> Horst Puschmann,<sup>c</sup> Subal Chandra Manna<sup>a,\*</sup>

<sup>a</sup> *Department of Chemistry, Vidyasagar University, Midnapore 721102, West Bengal, India, E-mail: scmanna@mail.vidyasagar.ac.in, Fax: (91) (03222) 275329.*

<sup>b</sup> *Department of Chemical and Pharmaceutical Sciences, University of Trieste, 34127 Trieste, Italy.*

<sup>c</sup> *Department of Chemistry, University of Durham, South Road, Durham DH1 3LE, U.K.*

#### **PXRD of complexes 1 and 2**

The X-ray powder diffraction (PXRD) patterns of bulk samples and simulated ones obtained from the single crystal XRD data of complexes **1** and **2** are compared in Fig. 1S: the result shows that simulated PXRD pattern indicates consistency with that of the correspondent bulk sample of **1** and **2**.

#### **Electronic absorption spectra of complexes**

The absorption spectrum of **HL** shown in Fig. 13S exhibits two broad bands at 350 and 450 nm with its maximum centered at 400 nm ( $\epsilon \sim 1.43 \times 10^4 \text{ L mole}^{-1} \text{ cm}^{-1}$ ) and 414 nm ( $\epsilon \sim 1.44 \times 10^4 \text{ L mole}^{-1} \text{ cm}^{-1}$ ); that of complex **1** at 387 nm ( $\epsilon \sim 0.8 \times 10^4 \text{ L mole}^{-1} \text{ cm}^{-1}$ ) and complex **2** at 388 nm ( $\epsilon \sim 1.21 \times 10^4 \text{ L mole}^{-1} \text{ cm}^{-1}$ ). The absorption properties of both the complexes in presence of different nitroaromatic compounds were investigated by adding equal amount of analytes. Upon the addition of an identical amount of different nitroaromatic compounds, a different degree of hyperchromic shift was observed for both complexes (Fig. 9S).

## ESI mass spectrometry

The ESI mass spectrum of **1** (Fig.14S) recorded in methanol shows a peak at  $m/z = 785.17$ , corresponding to  $[C_{38}H_{26}Zn_2N_{10}O_2]^+$  (calc.  $m/z = 785.46$ ). On the other hand, the spectrum of **2** (Fig.15S) shows a peak at  $m/z = 737.26$ , corresponding to  $[C_{34}H_{26}Zn_2N_{10}O_2]^+$  (calc.  $m/z = 737.42$ ). These results evidence that in solution the polymeric complex **1** underwent fragmentation to dinuclear species, while complex **2** in methanol maintains the structure detected in solid state.

**Table 1S.**  $\pi \cdots \pi$  Stacking interactions distances (Å) and angles ( $^\circ$ ) for compound **2**.<sup>a</sup>

| Cg(I)   | Cg(J) | Symmetry Cg(j) | Cg(I)-Cg(J) | $\alpha$  | $\beta$ | $\gamma$ | slippage |
|---------|-------|----------------|-------------|-----------|---------|----------|----------|
| py-N2   | py-N8 | 1-x,1-y,1-z    | 4.2561(16)  | 19.85(13) | 25.8    | 45.2     | 1.849    |
| py-N4   | py-N6 | 2-x,1-y,1-z    | 4.0398(15)  | 17.39(13) | 40.8    | 23.7     | 2.642    |
| C24/C29 | py-N6 | -1+x, -1+y, z  | 4.2390(17)  | 15.48(14) | 41.2    | 28.9     | 2.795    |

<sup>a</sup>Cg(I)-Cg(J): distance between ring centroids;  $\alpha$ : dihedral angle between planes Cg(I) and Cg(J);  $\beta$ : angle Cg(I)  $\rightarrow$  Cg(J) vector and normal to plane I;  $\gamma$ : angle Cg(I)  $\rightarrow$  Cg(J) vector and normal to plane J; slippage: distance between Cg(I) and perpendicular projection of Cg(J) on ring I.

**Table 2S.** Fluorescence life time (ns) of complexes **1** and **2**, recorded in different conditions.

|                       | Fluorescence life time |
|-----------------------|------------------------|
| Complex <b>1</b>      | 0.66                   |
| Complex <b>2</b>      | 0.79                   |
| Complex <b>1</b> + PA | 0.63                   |
| Complex <b>2</b> + PA | 0.78                   |

**Table 3S.** Comparison of picric acid sensing ability of complexes **1** and **2** with respect to other Zn(II) complexes.

| Complex                                      | LOD (M)                  | $K_{sv}$ ( $M^{-1}$ ) | Reference |
|----------------------------------------------|--------------------------|-----------------------|-----------|
| <b>1</b>                                     | $1.30603 \times 10^{-6}$ | $2.8 \times 10^5$     | this work |
| <b>2</b>                                     | $2.9819 \times 10^{-6}$  | $2.3 \times 10^5$     | this work |
| $Zn_4(DMF)(urotropine)_2(NDC)_4$             | $7.1 \times 10^{-6}$     | $10.83 \times 10^4$   | 16a       |
| $[CH_3)_2NH_2)_3[Zn_4Na(BPTC)_3].4H_2O.2DMF$ | $5 \times 10^{-6}$       | $3.2 \times 10^4$     | 16b       |
| $[Zn_2(NH_2BDC)_2(dpNDI)]_n$                 | $1.31 \times 10^{-6}$    | NA                    | 16c       |
| $[Zn_2LCI_2(H_2O)]$                          | $3.986 \times 10^{-9}$   | $8.063 \times 10^4$   | 17c       |

|                                                                                  |                        |                     |     |
|----------------------------------------------------------------------------------|------------------------|---------------------|-----|
| $[\text{Zn}_2\text{L}(\text{SCN})_2(\text{H}_2\text{O})]\cdot\text{H}_2\text{O}$ | $3.974 \times 10^{-9}$ | $7.987 \times 10^4$ | 17c |
| $[\text{Zn}_2\text{L}(\text{N}_3)(\text{CH}_3\text{CO}_2)]$                      | $3.914 \times 10^{-9}$ | $8.51 \times 10^4$  | 17c |

- (16a) S. Mukherjee, A.V. Desai, B. Manna, A.I. Inamdar, S.K. Ghosh, *Cryst. Growth Des.* 2015, 15, 4627-4634. NDC = 2,6-naphthalenedicarboxylic.
- (16b) E.L. Zhou, P. Huang, C. Qin, K. Z. Shao, Z. Su, *J. Mater. Chem. A* 2015, 3, 7224-7228. BPTC = biphenyl-tetracarboxylic acid.
- (16c) S.S. Dhankhar, N. Sharma, S. Kumar, T.J.D. Kumar, C.M. Nagaraja, *Chem. Eur. J.* 2017, 23, 16204-16212. NH<sub>2</sub>BDC = 2-aminoterephthalic acid, dpNDI = N,N'-di(4-pyridyl)-1,4,5,8-naphthalenediimide.
- (17c) A. Das, S. Jana, A. Ghosh, *Cryst. Growth Des.* 2018, 18, 2335-2348. L = N,N'-dimethyl-N,N'-bis(2-hydroxy-3-methoxy-5-methylbenzyl)ethylenediamine.

**Table 4S.** IR bands ( $\text{cm}^{-1}$ ) of complexes 1-2.

| Selected bond                          | HL       | complex 1            | complex 2      |
|----------------------------------------|----------|----------------------|----------------|
| $\nu(\text{C}_{\text{sp}^2}\text{-H})$ | 3056 (w) | 2921 (w)             | 3068 (vw)      |
| $\nu(\text{C}\equiv\text{N})$          | -        | 2323, 2264, 2185 (s) | -              |
| $\nu(\text{N}\equiv\text{N})$          | -        | -                    | 2091, 2062 (s) |
| $\nu(\text{C}=\text{N})$               | 1624 (s) | 1622 (s)             | 1628 (s)       |
| $\nu(\text{ArC}=\text{C})$             | 1543 (m) | 1540 (m)             | 1540 (m)       |

m = medium, s = strong, w = weak, vw = very weak

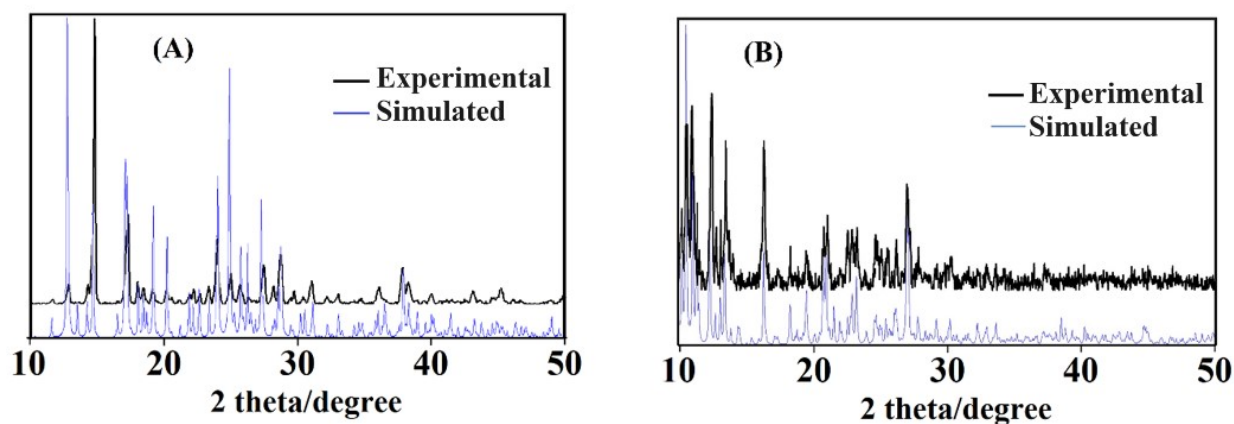

**Fig.1S.** Experimental and simulated X-ray diffraction patterns of complexes 1(A) and 2 (B).

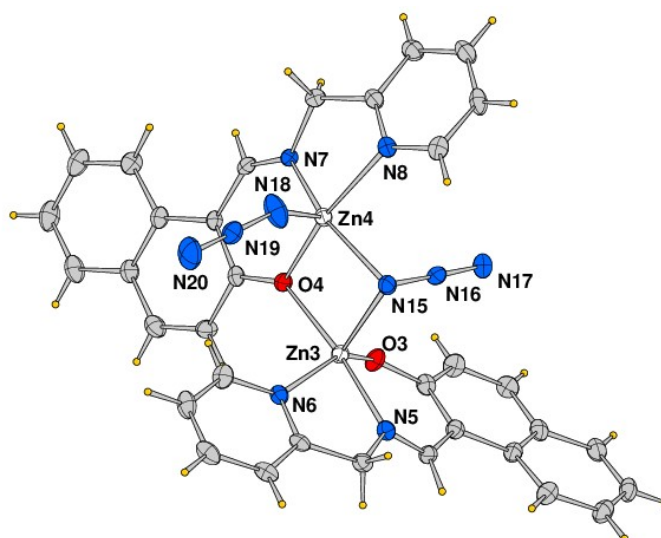

**Fig.2S.**Ortep view (ellipsoid probability at 50%) of complex B of compound 2.

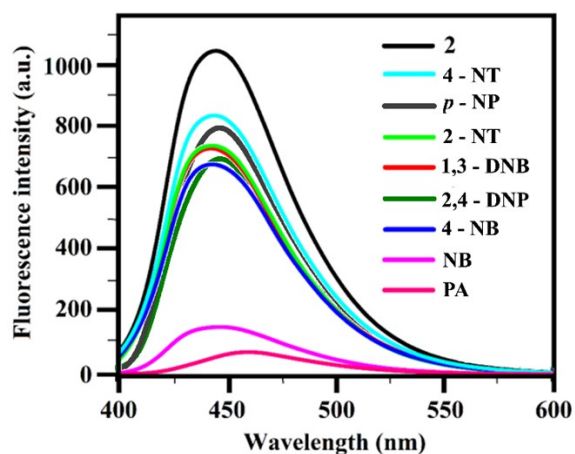

**Fig.3S.** Change of emission intensity of complex 1 (3 ml  $2.16 \times 10^{-7}$  M  $\equiv 6.48 \times 10^{-10}$  moles) upon the addition of different nitroaromatic compounds (100  $\mu$ L,  $6.2 \times 10^{-4}$  M  $\equiv 6.2 \times 10^{-8}$  moles).

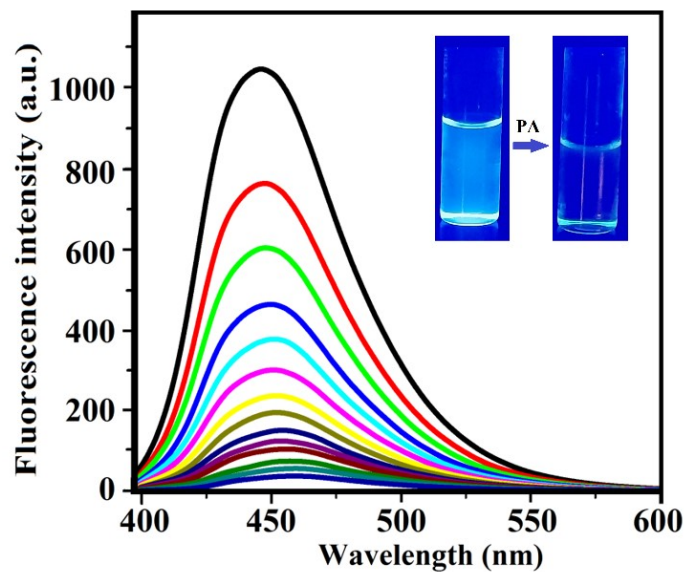

**Fig.4S.** Luminescence quenching of complex **2** by gradual addition of  $4 \times 10^{-4}$  M PA (20  $\mu$ L-260  $\mu$ L).(Inset: visual colour change of the complex solutions (under UV light, 366 nm) upon addition of PA.

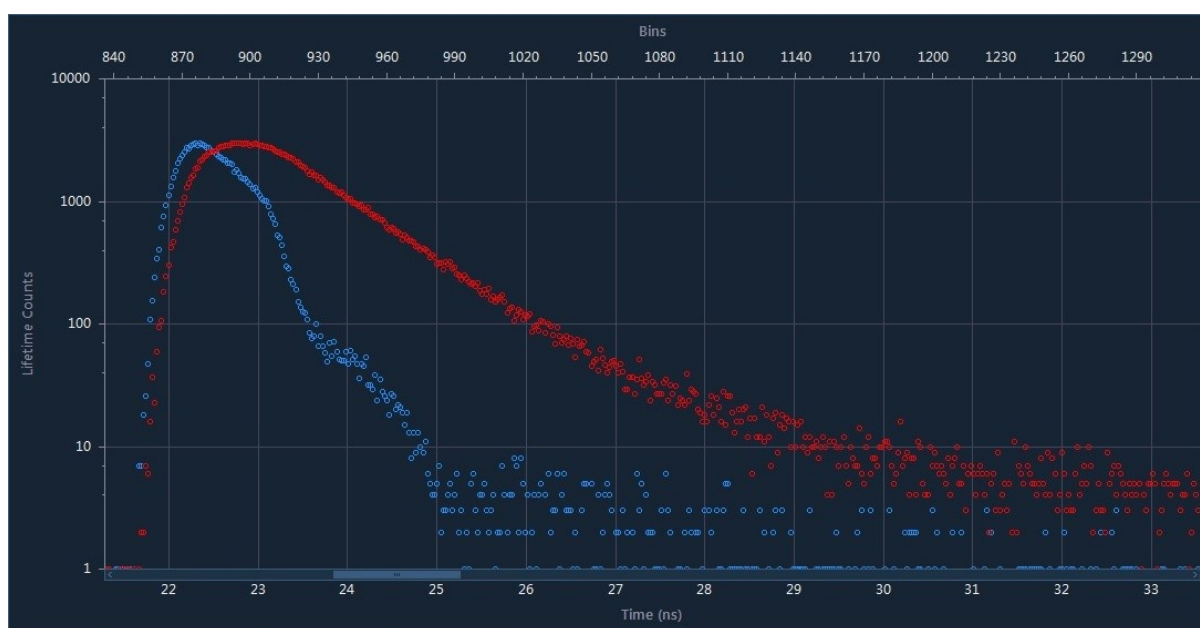

**Fig.5S.** Fluorescence lifetime decay profile of complex **1**.

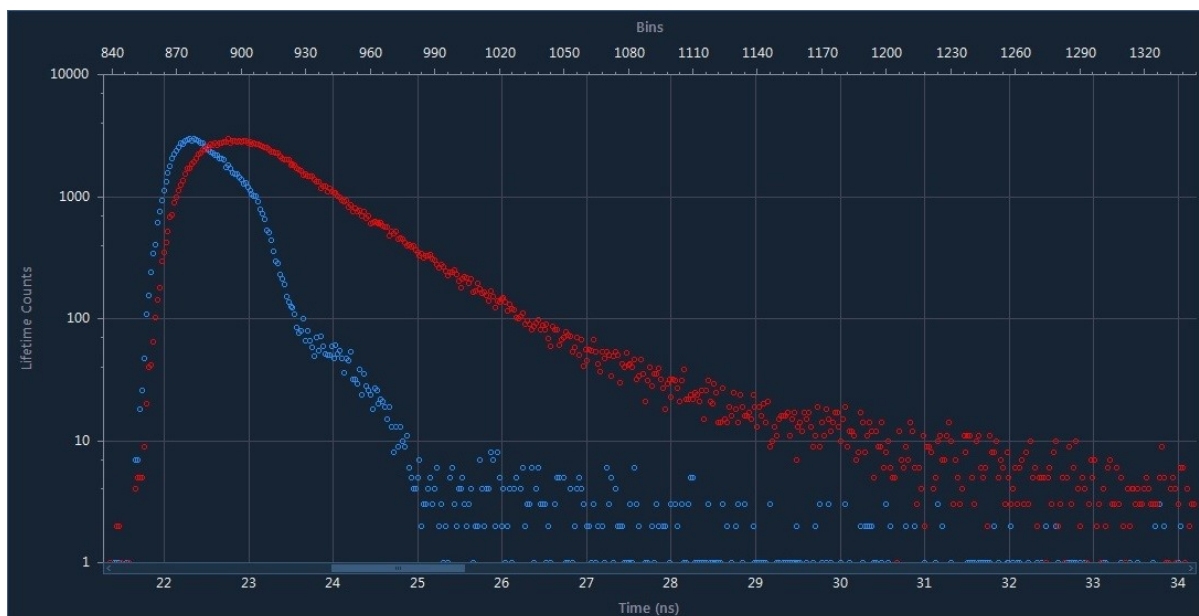

**Fig.6S.** Fluorescence lifetime decay profile of complex 2.

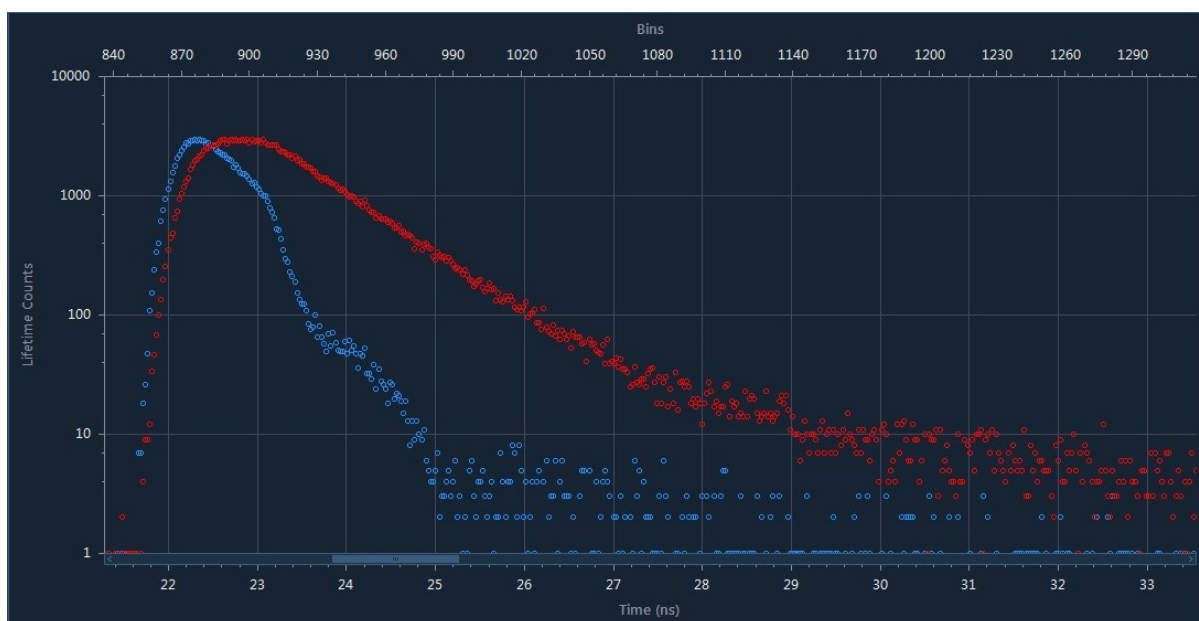

**Fig.7S.** Fluorescence lifetime decay profile of complex 1 after addition of PA.

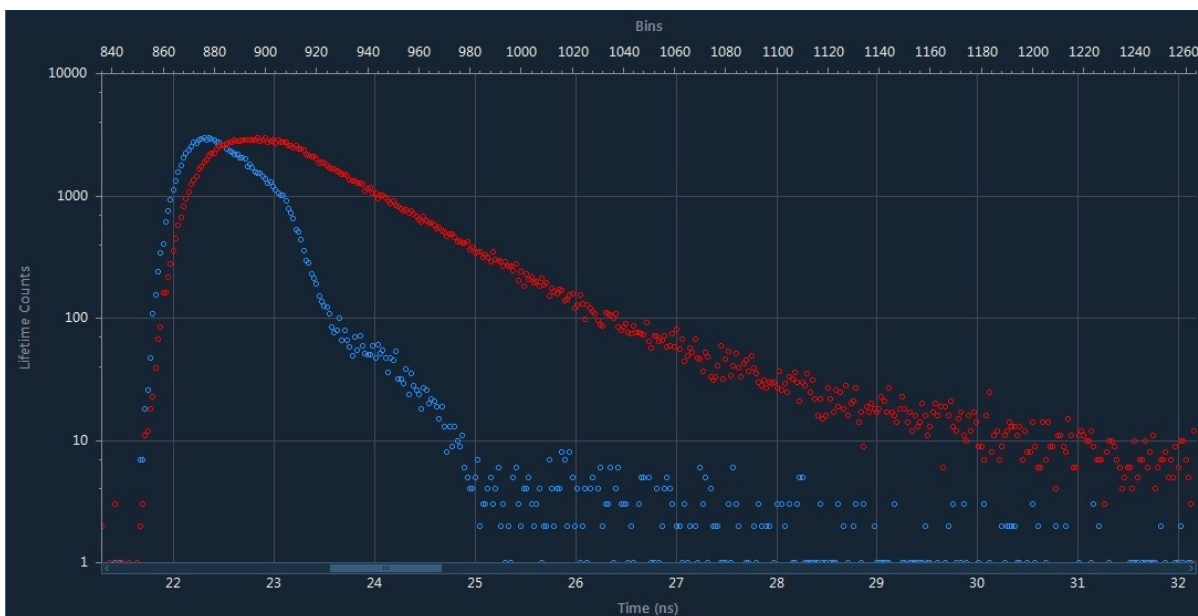

**Fig.8S.** Fluorescence lifetime decay profile of complex **2** after addition of PA.

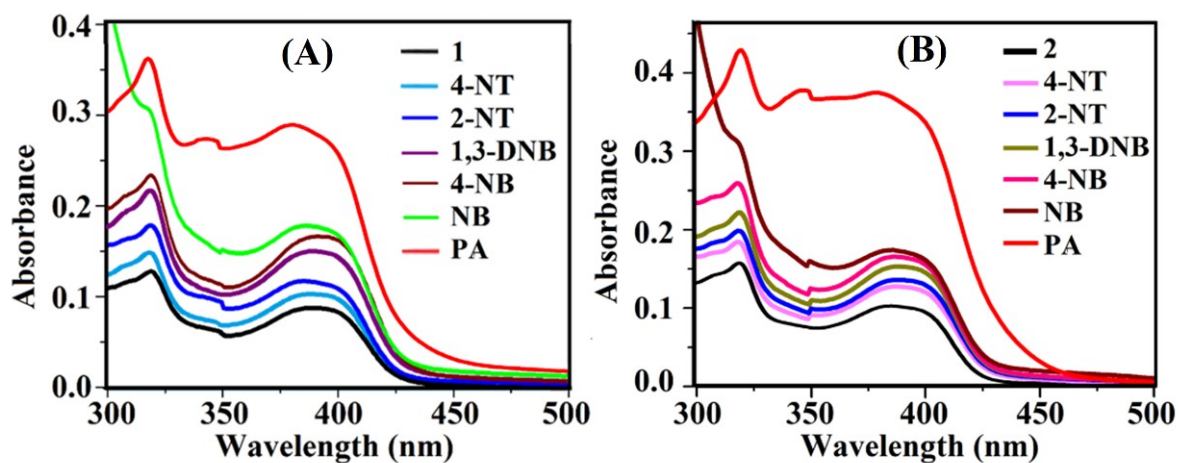

**Fig.9S.** Electronic spectra of complexes **1** (A) and **2** (B) in presence of different nitroaromatic compounds.

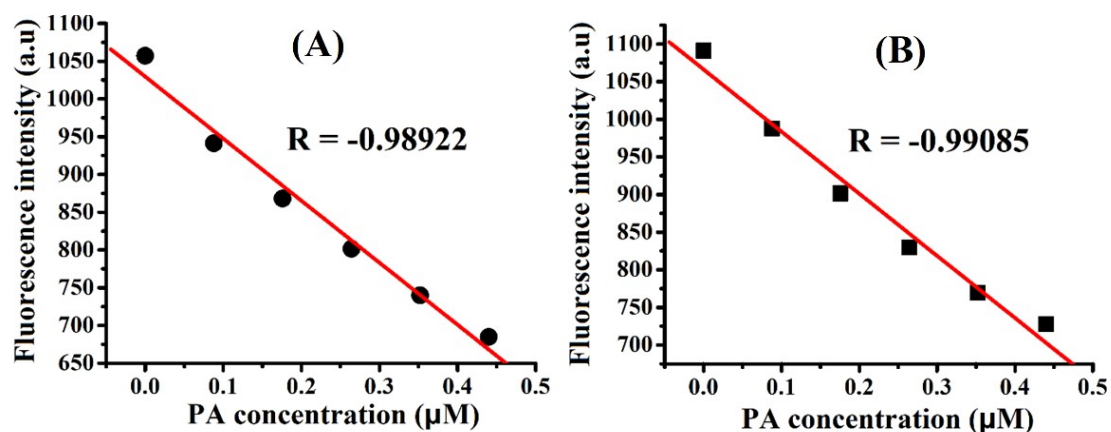

**Fig.10S.** Plot of fluorescence intensity of complexes vs concentration of PA [(A) for 1; (B) for 2].

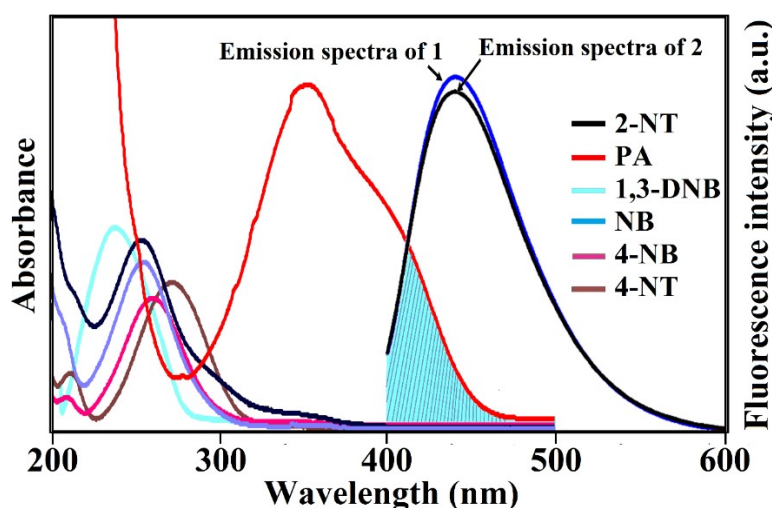

**Fig.11S.** Spectral overlap of the absorption spectra of analytes (including PA), and the emission spectra of complexes 1-2.

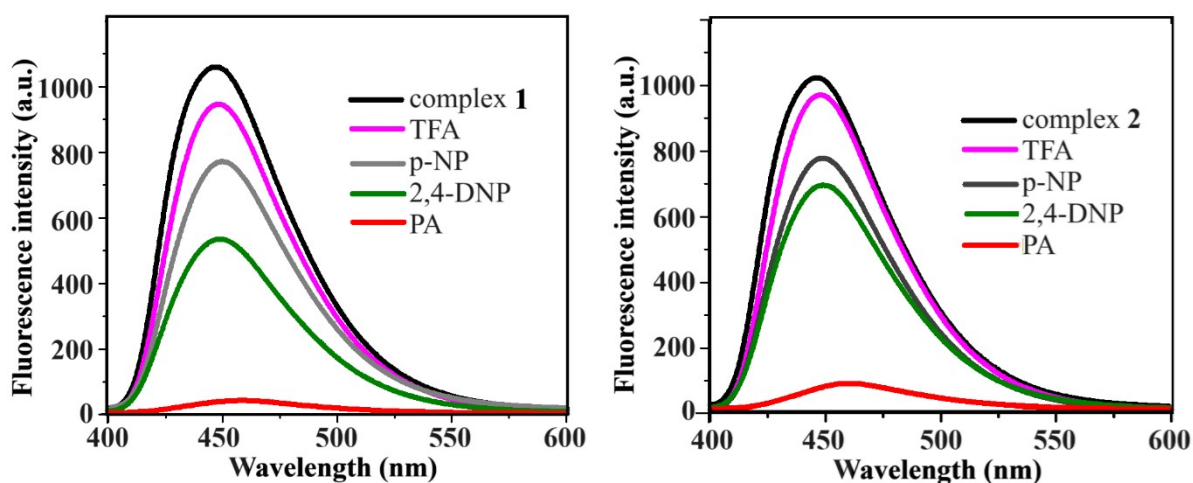



**Fig.12S.** Change of emission intensity of complexes **1** and **2** ( $50\mu\text{L}$ ,  $1.3 \times 10^{-5} \text{ M} \equiv 6.5 \times 10^{-10}$  mole) upon the addition of TFA (trifluoroacetic acid), *p*-NP (*p*-nitrophenol), 2,4-DNP (2,4-dinitrophenol), PA (picric acid) analytes ( $100\mu\text{L}$ ,  $6.2 \times 10^{-4} \text{ M} \equiv 6.2 \times 10^{-8}$  mole).

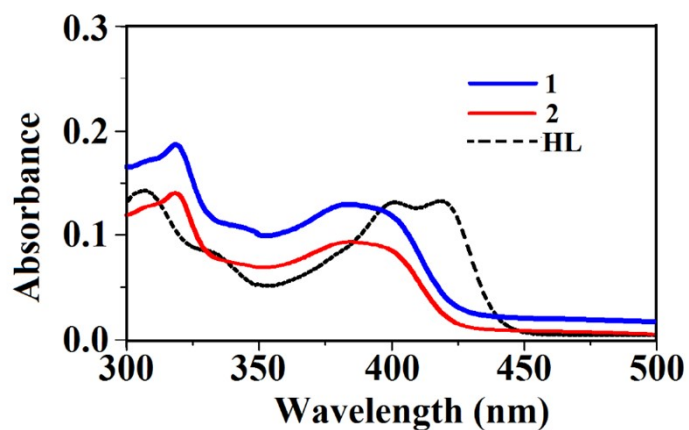

**Fig.13S.** Absorption spectra of **HL**, complexes **1** and **2** in methanol.

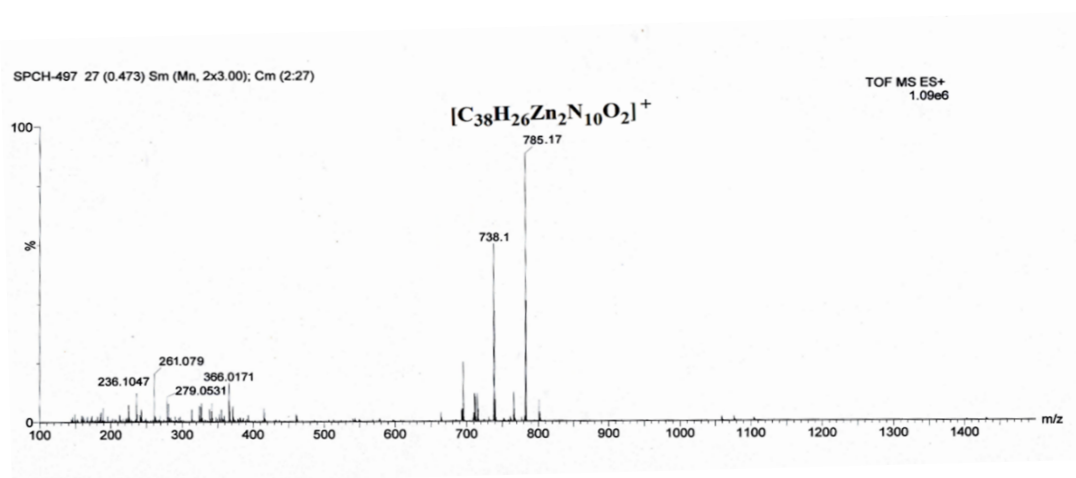

**Fig.14S.** ESI mass spectra of complex **1**.

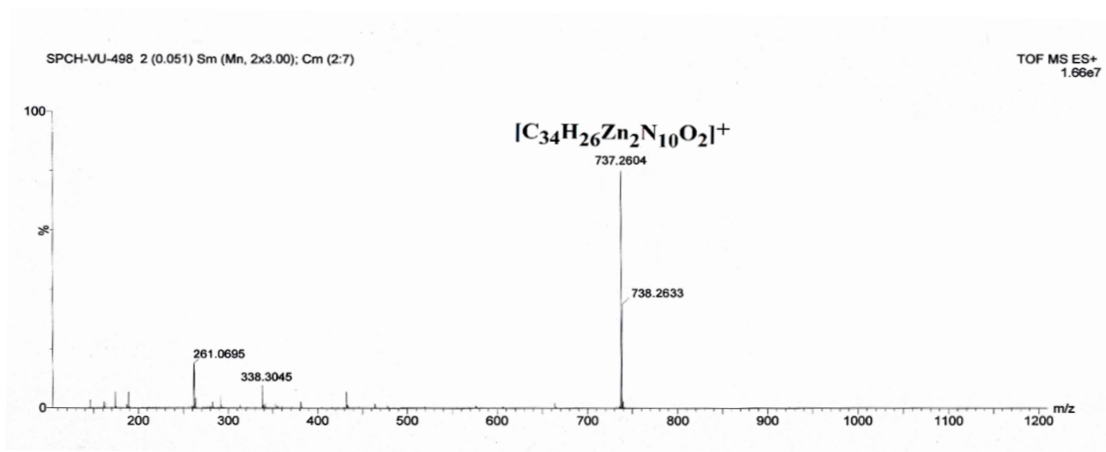

**Fig. 15S.** ESI mass spectra of complex 2.

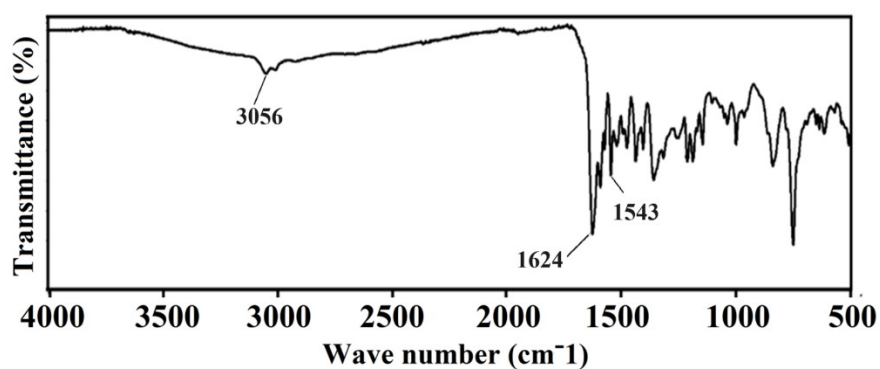

**Fig.16S.** FT-IR spectrum of free ligand (HL).

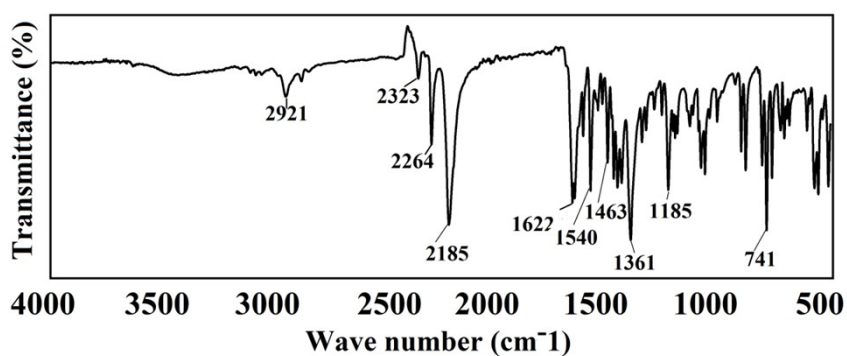

**Fig.17S.** FT-IR spectrum of complex 1.

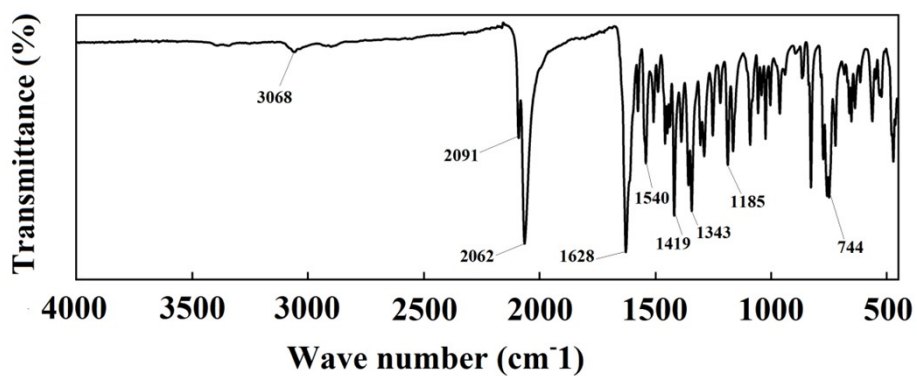

**Fig.18S.** FT-IR spectrum of complex 2.

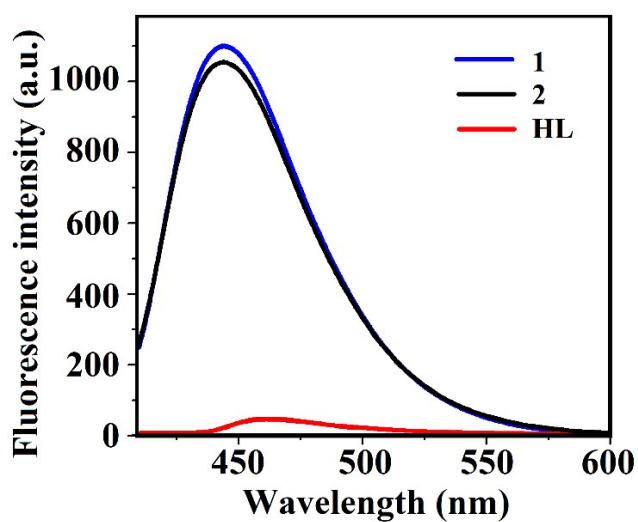

**Fig.19S.** Emission spectra of HL and of complexes 1 and 2 in methanol.

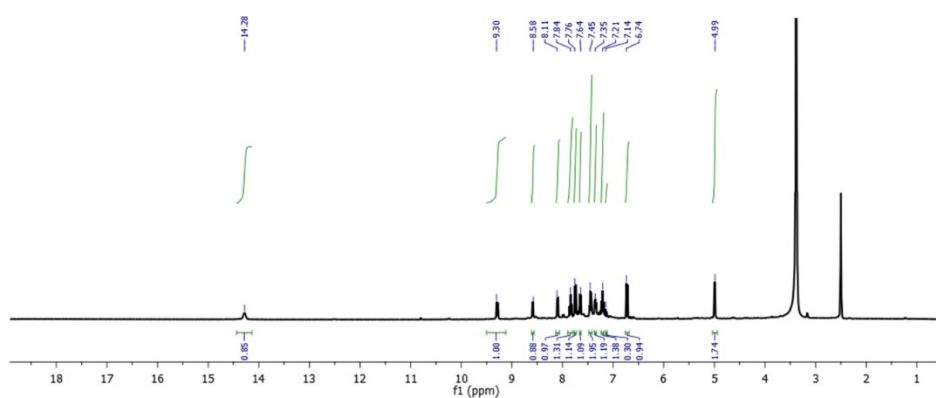

**Fig.20S.**  $^1\text{H-NMR}$  spectrum of ligand in  $\text{d}_6\text{-DMSO}$  solvent

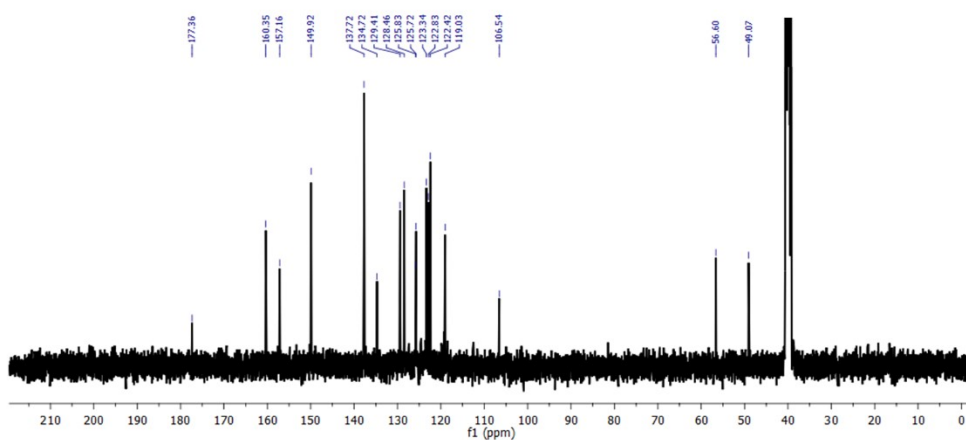

**Fig.21S.**  $^{13}\text{C-NMR}$  spectrum of ligand in  $\text{d}_6\text{-DMSO}$  solvent

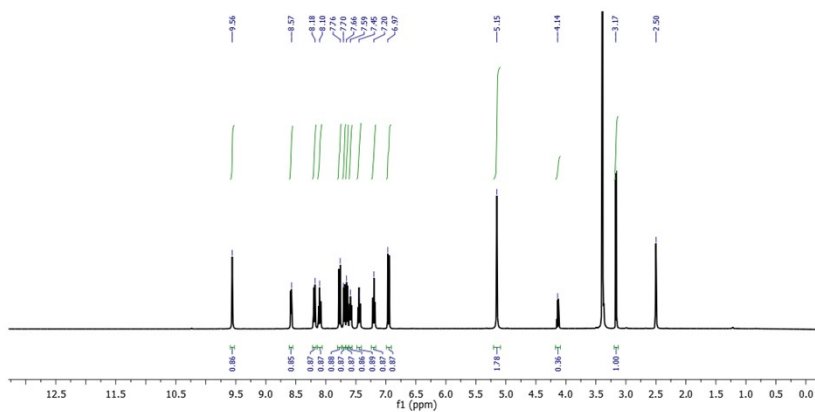

**Fig.22S.**  $^1\text{H-NMR}$  spectrum of complex **1** in  $\text{d}_6\text{-DMSO}$  solvent.

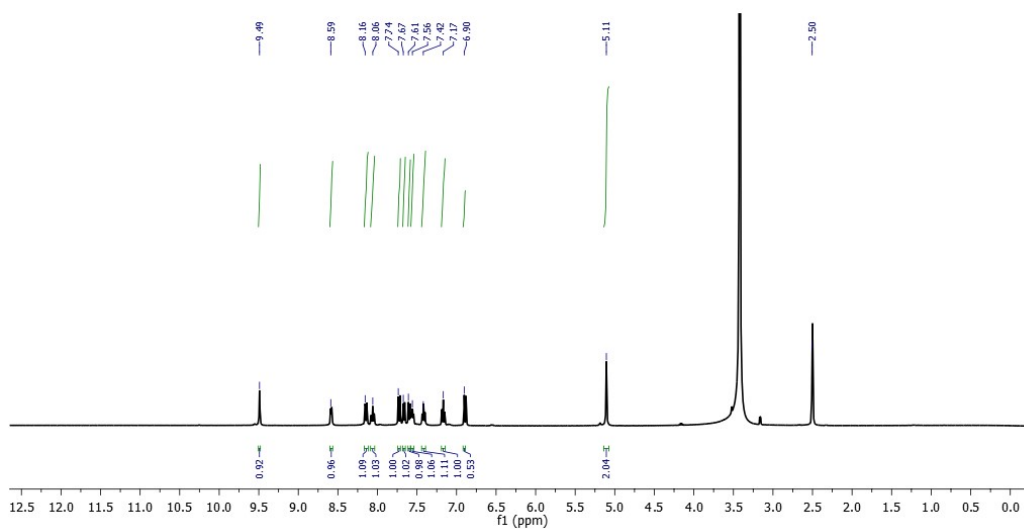

**Fig.23S.**  $^1\text{H-NMR}$  spectrum of complex **2** in  $\text{d}_6\text{-DMSO}$  solvent

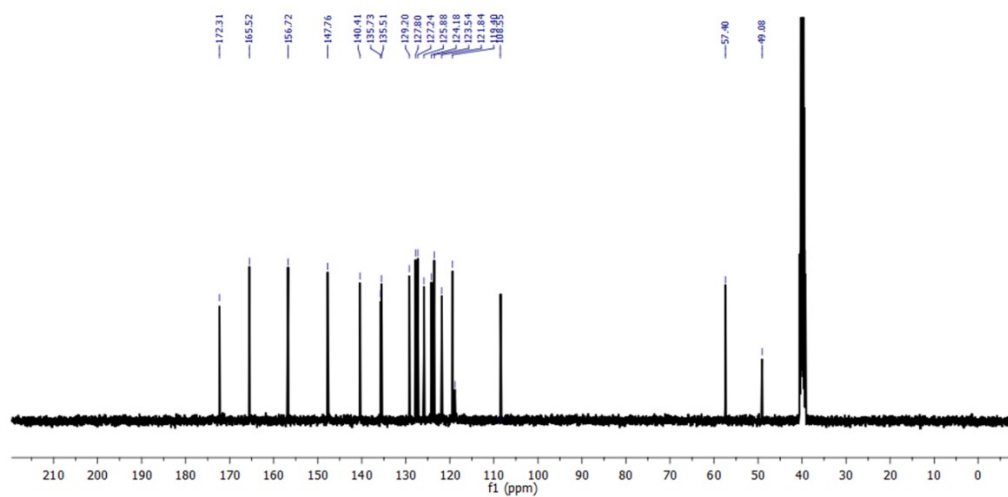

**Fig.24S.**  $^{13}\text{C-NMR}$  spectrum of complex **1** in  $\text{d}_6\text{-DMSO}$  solvent

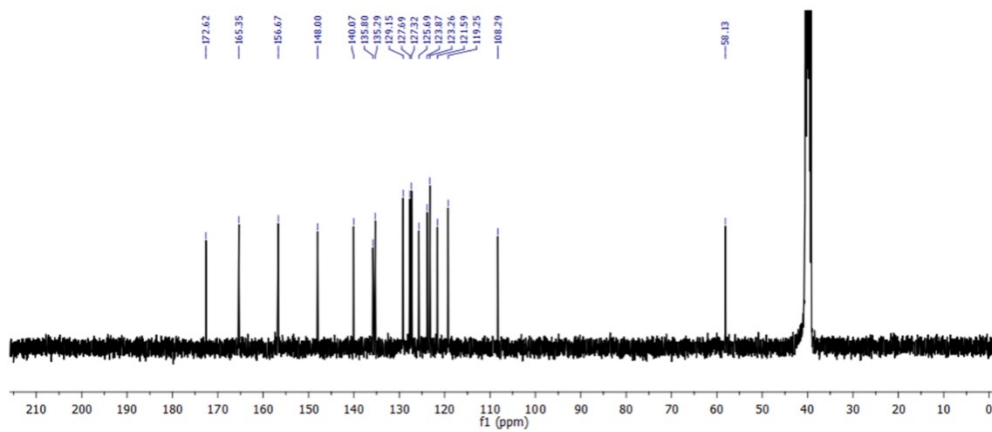

**Fig.25S.**  $^{13}\text{C-NMR}$  spectra of complex **2** in  $\text{d}_6\text{-DMSO}$  solvent
